# Supplementary material
Source: PubMed Central journal article supplement (PMC5785775)

Supporting Information for  
Generating Focussed Molecule Libraries for Drug Discovery with Recurrent  
Neural Networks

Marwin H.S.Segler, Thierry Kogej, Christian Tyrchan, Mark P. Waller

marwin.segler@wwu.de, waller@shu.edu.cn

In the following, a few randomly selected molecules produced with the general model trained on ChEMBL are shown.

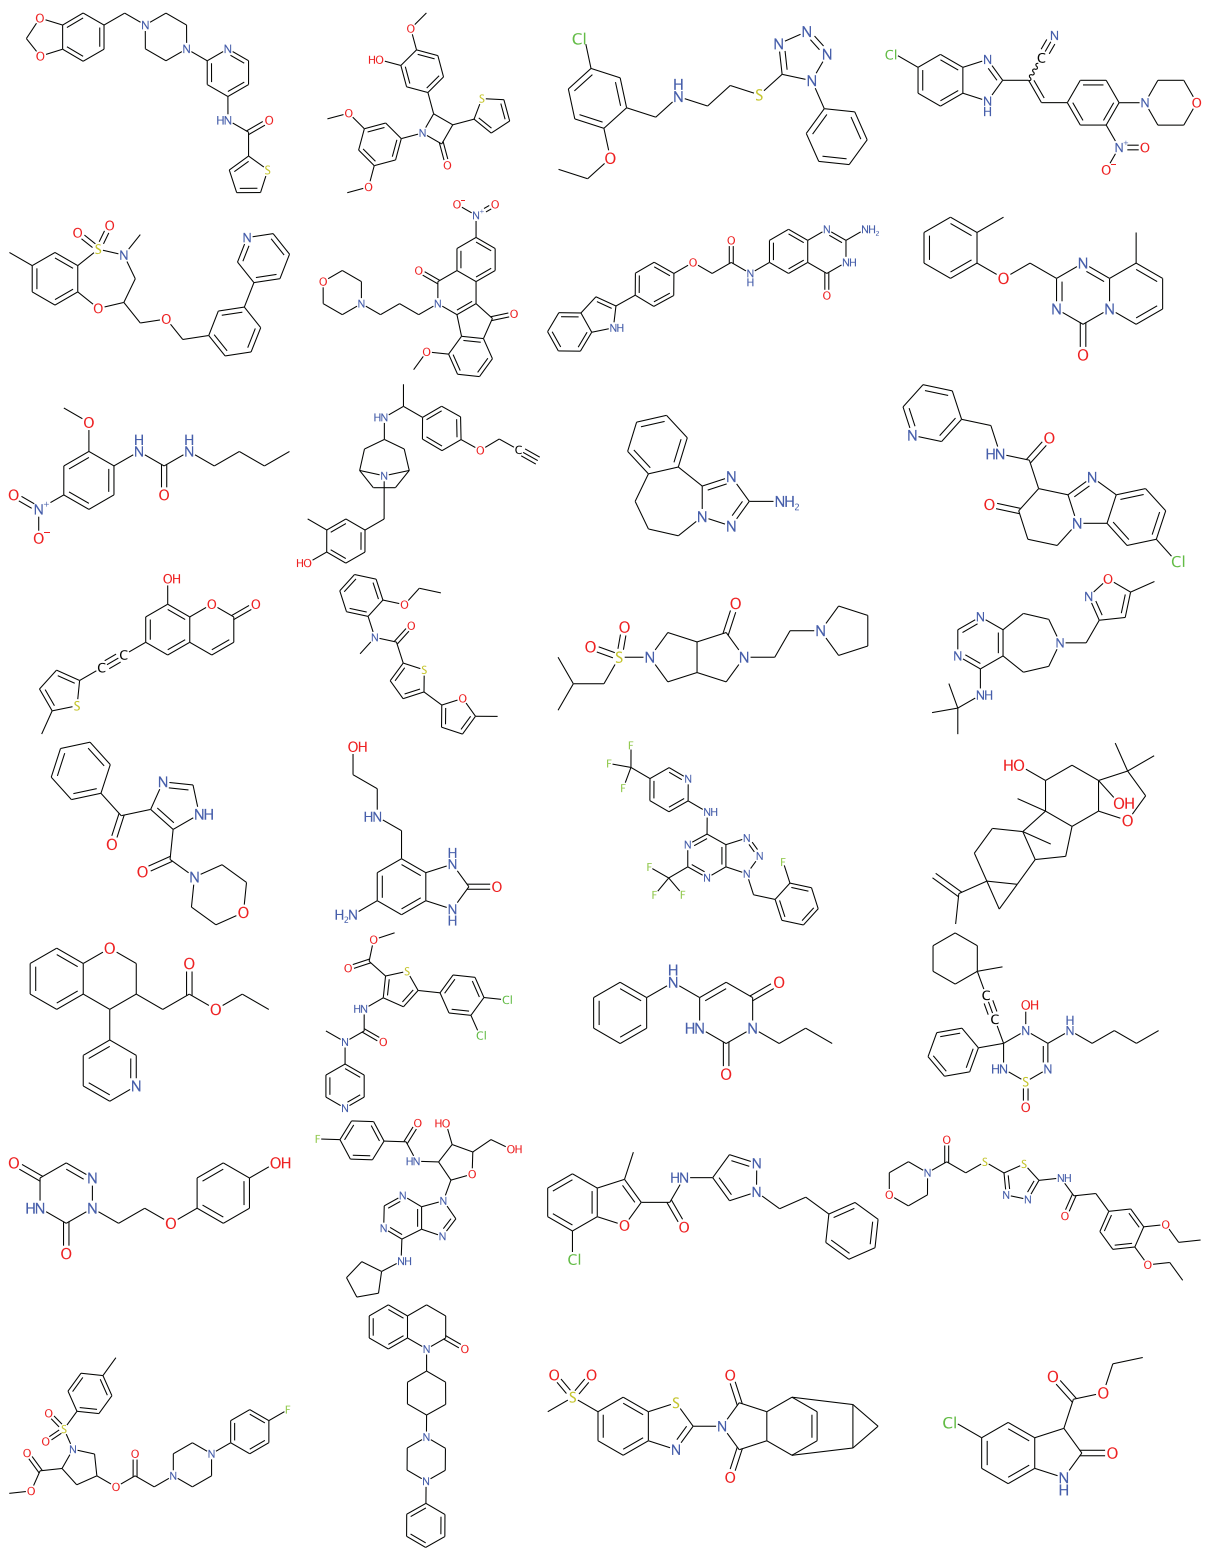

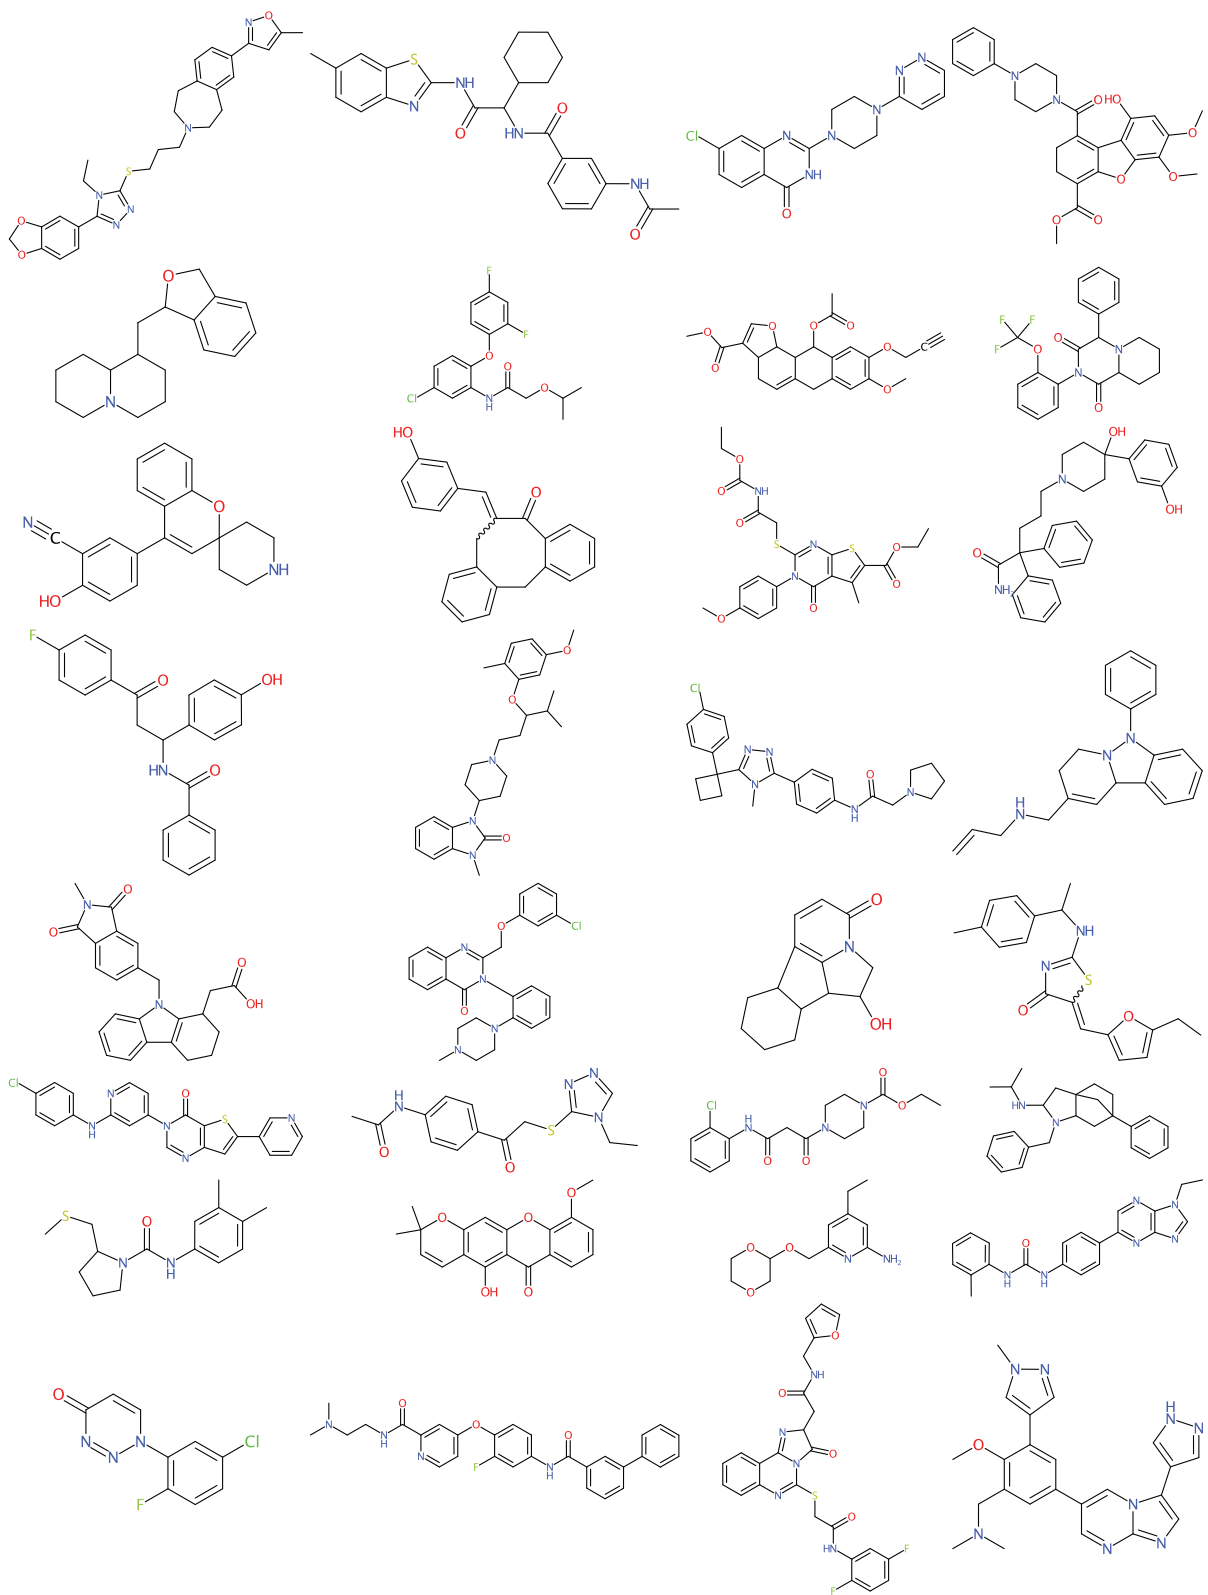

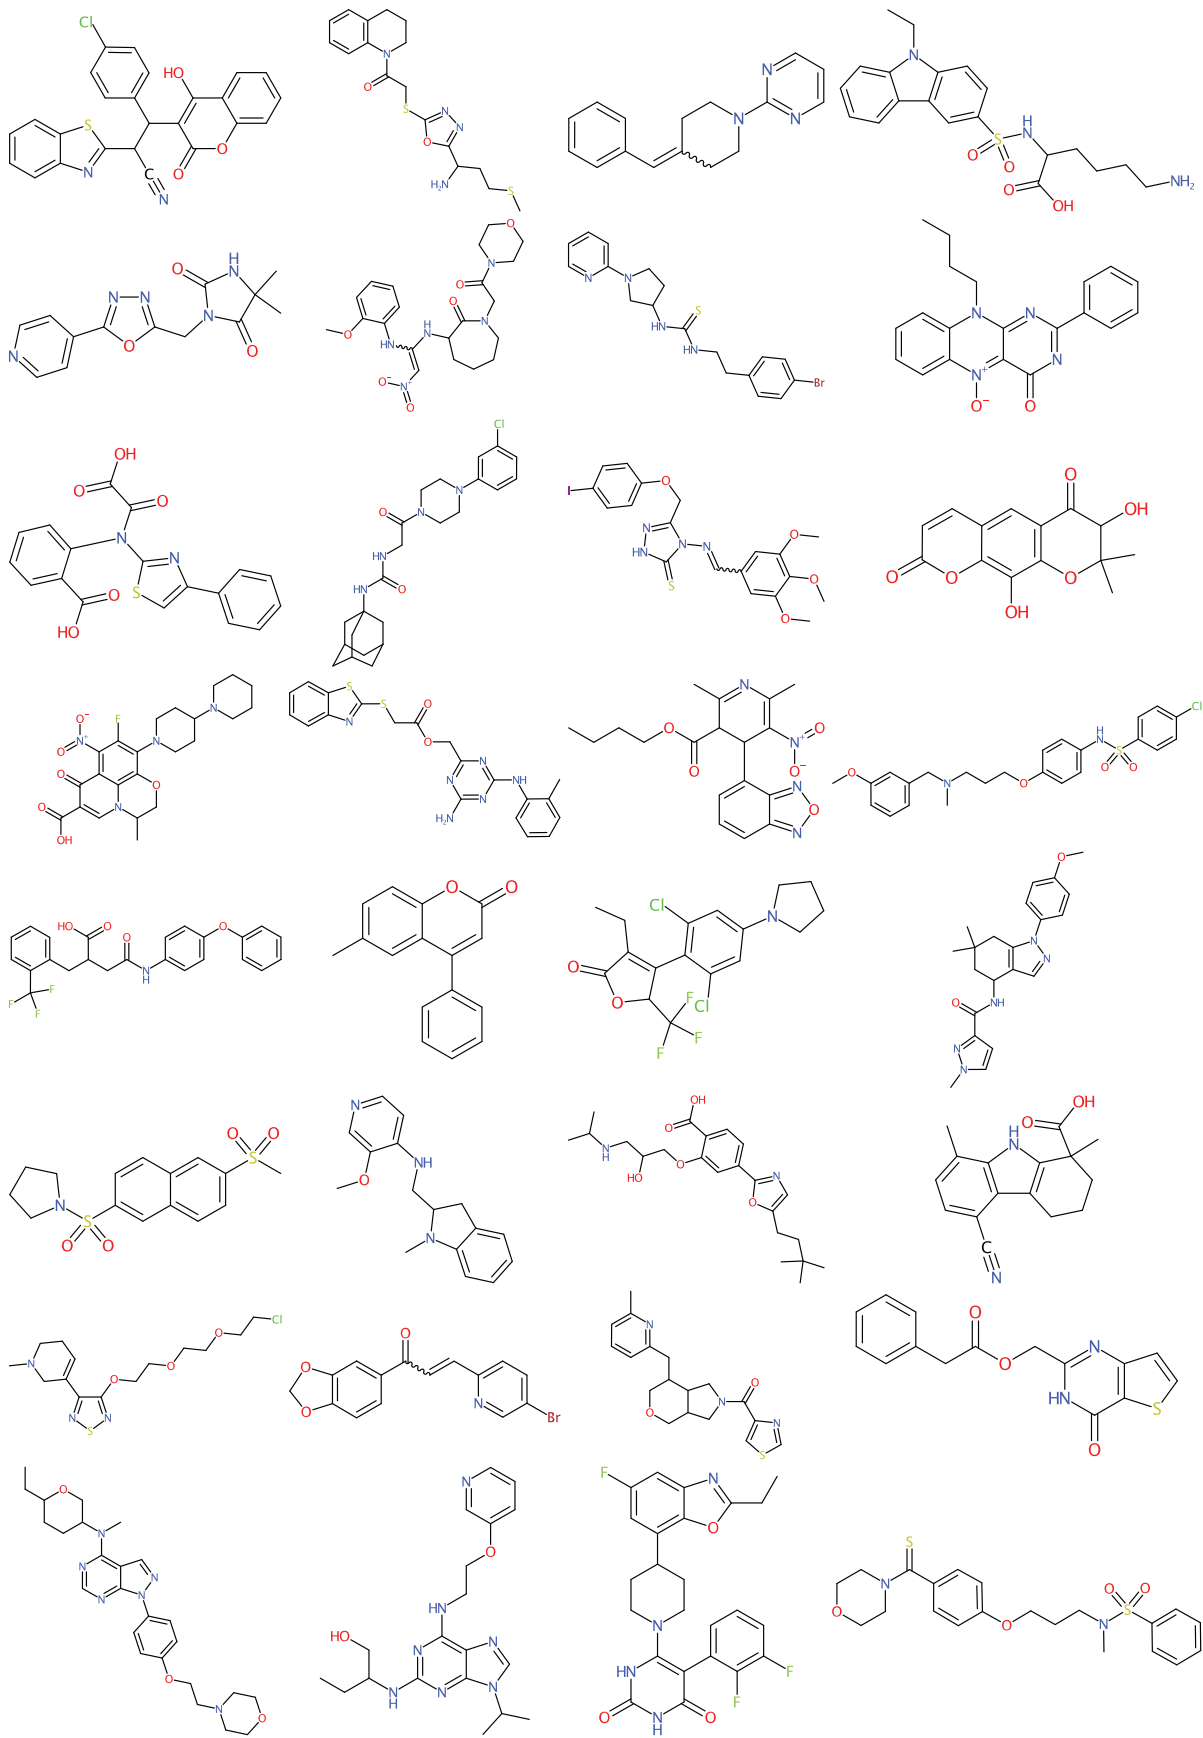

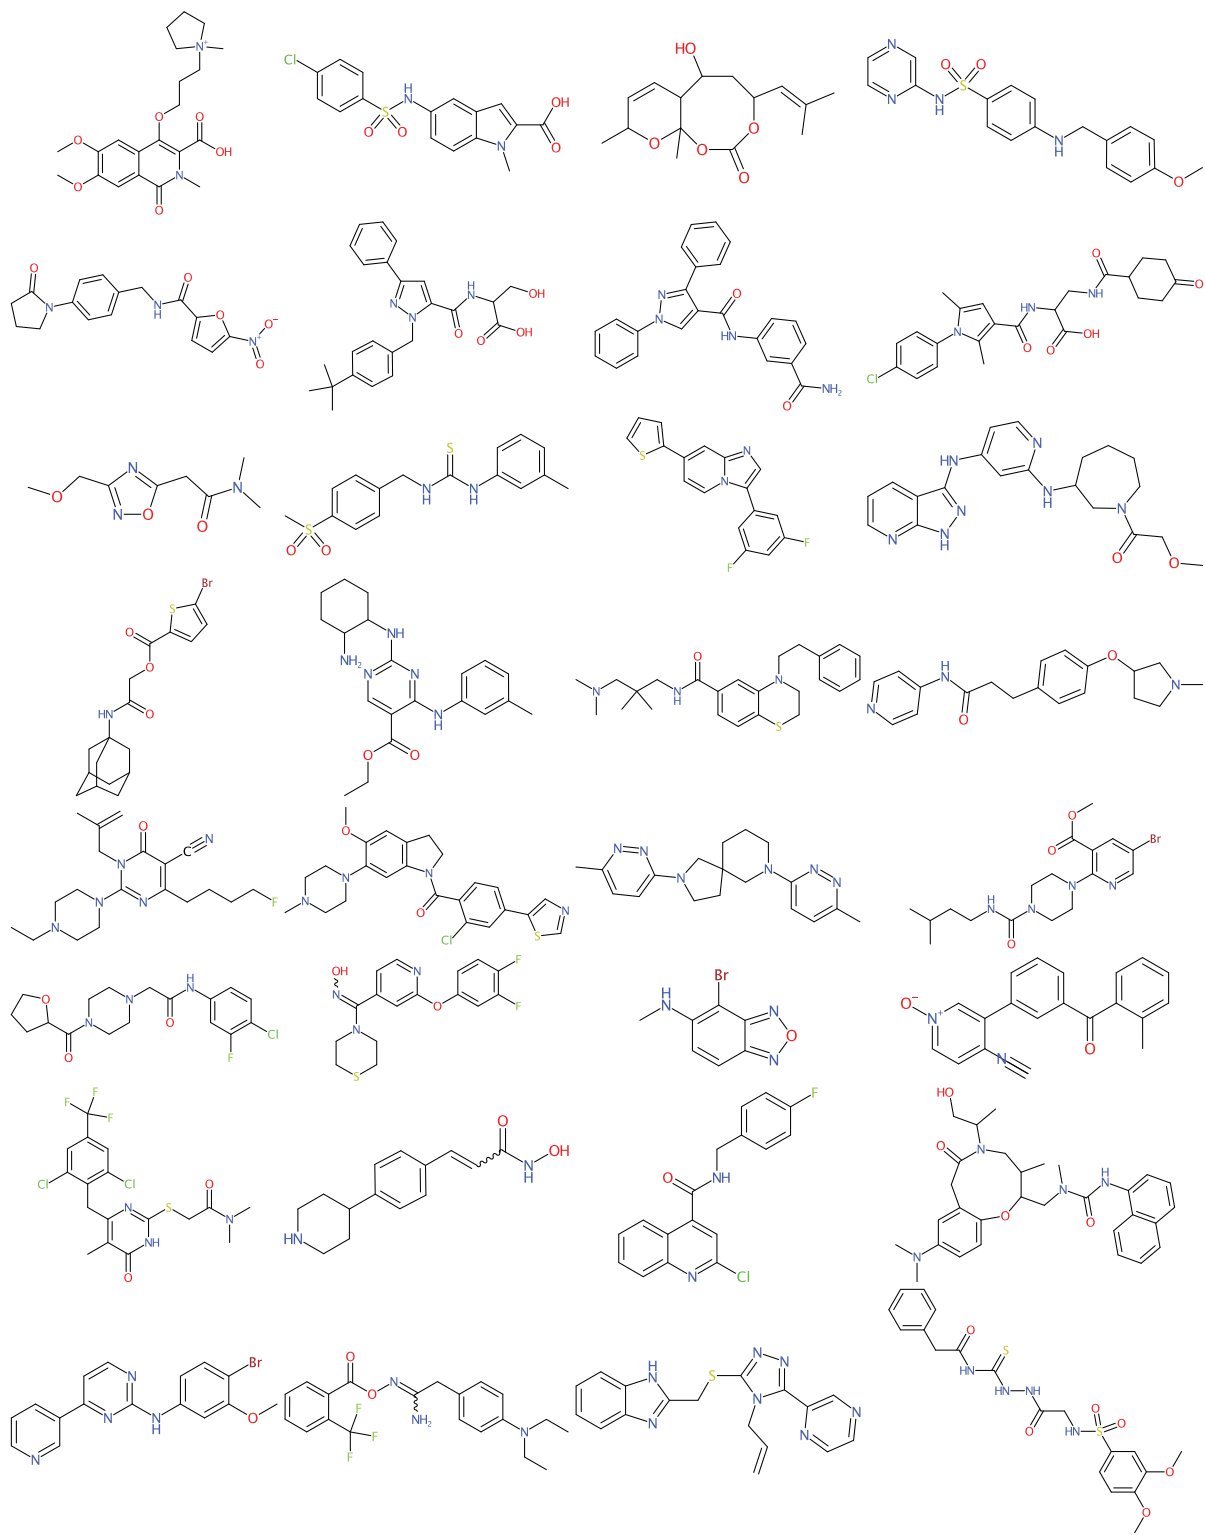

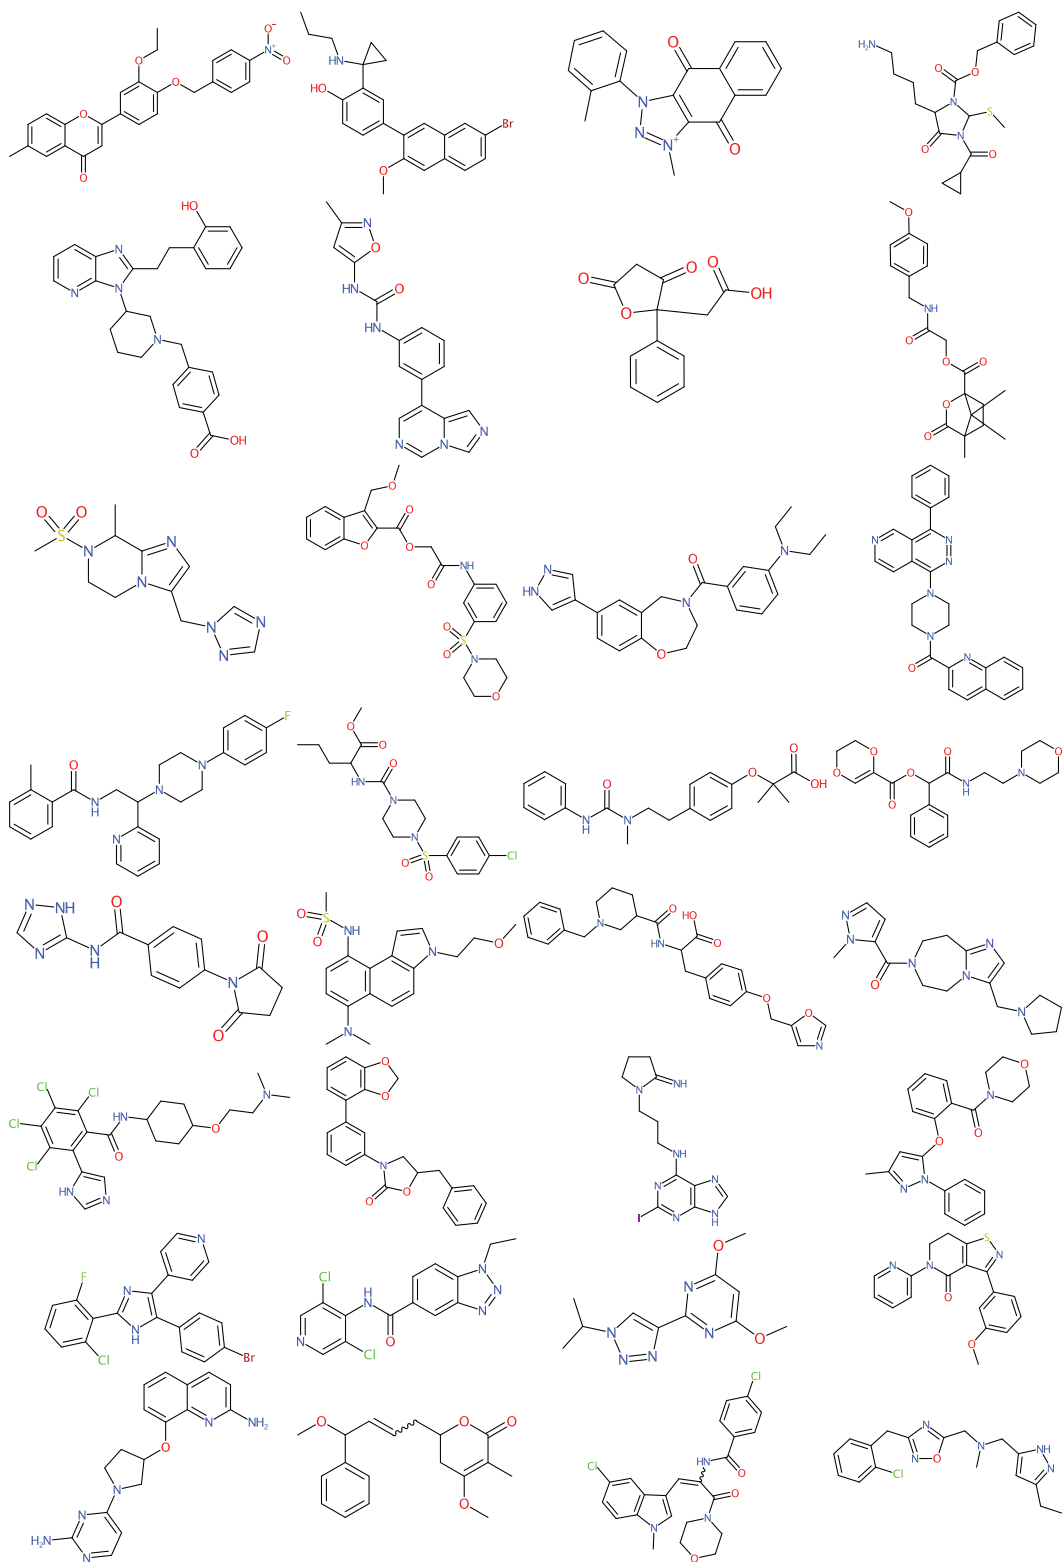

Supplement: oc7b00512_si_001.pdf [file oc7b00512_si_001.pdf]
